# Supplementary material
Source: MDPI journal article supplement (https://www.mdpi.com/search?q=materials-12-02334)
Supplement: s001 [file materials-12-02334-s001.pdf]

# Mg/Al LDH Enhances Sulfate removal and Clarification of AMD Wastewater in Precipitation Processes

Paulina Maziarz <sup>1,\*</sup>, Jakub Matusik <sup>1</sup> and Tiina Leiviskä <sup>2</sup>

<sup>1</sup> AGH University of Science and Technology; Faculty of Geology, Geophysics and Environmental, Protection; Department of Mineralogy, Petrography and Geochemistry, al. Mickiewicza 30, 30-059 Krakow, Poland, jmatusik@agh.edu.pl

<sup>2</sup> University of Oulu, Chemical Process Engineering, P.O. Box 4300, FIN-90014 University of Oulu, Oulu, Finland, tiina.leiviska@oulu.fi

\* Correspondence: pmaziarz@agh.edu.pl

**Table S1.** The concentration of elements in the AMD water before and after treatment with SA+LDH measured with Inductively Coupled Plasma - Optical Emission Spectrometer (ICP-OES)/ Mass Spectrometry (ICP-MS).

|      | AMD water                  |                           |                           |
|------|----------------------------|---------------------------|---------------------------|
|      | Before treatment<br>(mg/L) | After treatment<br>(mg/L) | Detection limit<br>(mg/L) |
| Al*  | 75.66                      | 2.07                      | 0.01                      |
| As** | 19.662                     | 0.021                     | 0.001                     |
| Ca** | 216.9                      | 591.4                     | 0.05                      |
| Cd** | 0.004                      | <0.0003                   | 0.0003                    |
| Co*  | 1.495                      | 0.0009                    | 0.0002                    |
| Cr** | 0.856                      | 0.005                     | 0.005                     |
| Cu** | 5.069                      | 0.007                     | 0.001                     |
| Fe*  | 1116                       | <0.01                     | 0.01                      |
| Mg*  | 23.18                      | 0.845                     | 0.1                       |
| Mn*  | 1.81                       | <0.005                    | 0.005                     |
| Na*  | 6.19                       | 12.25                     | 0.1                       |
| Ni** | 0.959                      | 0.002                     | 0.001                     |
| P**  | 0.930                      | <0.0061                   | 0.0061                    |
| Sb** | 0.325                      | <0.0002                   | 0.0002                    |
| Si*  | 69.75                      | <0.1                      | 0.1                       |
| Tl** | 0.004                      | 0.0013                    | 0.0001                    |
| V**  | 0.205                      | <0.001                    | 0.001                     |
| Zn*  | 0.39                       | 0.0750                    | 0.01                      |
| Zr** | 0.011                      | <0.002                    | 0.002                     |

\*ICP-OES, \*\*ICP-MS
